# Supplementary material
Source: publisher figshare collection journal article supplement (https://acs.figshare.com/ndownloader/files/3621312)
Supplement: Supplementary file 1 [file 3621312]

**Ziram and Sodium *N,N*-Dimethyldithiocarbamate Inhibit Ubiquitin Activation Through Intracellular Metal Transport and Increased Oxidative Stress in HEK293 Cells.**

*Kathleen E Dennis<sup>\*,†</sup> and William M Valentine<sup>†,‡,¶</sup>*

<sup>†</sup>Department of Pathology, Microbiology and Immunology, <sup>‡</sup>Center in Molecular Toxicology, <sup>¶</sup>Vanderbilt Brain Institute, Vanderbilt University Medical Center 1161 21st Avenue South, Nashville TN 37232-2561

\*Kathleen E Dennis, PhD

Staff Scientist

Dept. of Pathology, Microbiology & Immunology

Room CC3301 Medical Center North

Vanderbilt University Medical Center

Nashville TN 37232-2561

Phone: 615-343-5834

Fax: 615-343-9825

[kathleen.e.dennis@vanderbilt.edu](mailto:kathleen.e.dennis@vanderbilt.edu)

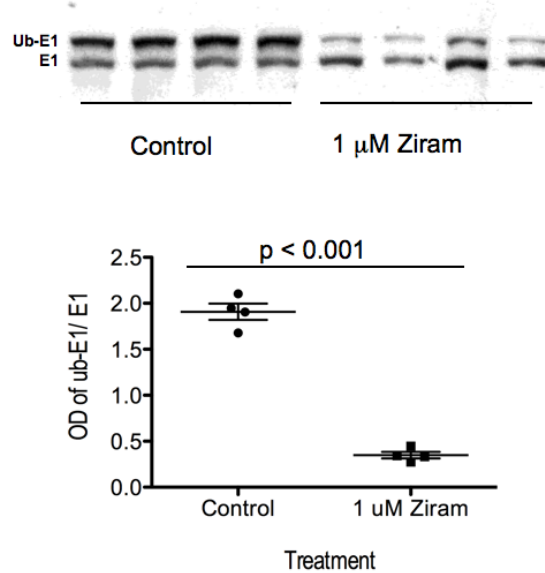

**Figure S1**

**Supplemental Data 1** Inhibition of E1 activation by 1.0  $\mu\text{M}$  ziram. HEK293 cells were incubated in the presence or absence of 1  $\mu\text{M}$  ziram for 6 hours. Cells were harvested and extracts analyzed by western blot (see Materials and Methods for details). Graph depicts the mean ratio of ub-E1/E1 values (+SE) for each group. Statistical comparisons were performed using non-paired student *t* test (\*\* $p < 0.001$ ).
